# Supplementary material for: Evaluating Methods for Isolating Total RNA and Predicting the Success of Sequencing Phylogenetically Diverse Plant Transcriptomes
Source: PubMed Central journal article supplement (PMC3504007; doi:10.1371/journal.pone.0050226), 2012-11-21
Supplement: pone.0050226.s004.pdf [file pone.0050226.s004.pdf]

**Table S3** Correlations in the number of scaffolds with different minimum threshold size cutoffs used during assemblies. For example, the column labeled 500 bp contains all scaffolds that are 500 bp or larger. Pearson product moment correlation coefficients ( $r$ ) are shown in the upper triangular matrix, and P-values are shown in the lower triangular matrix.

|         | 1000 bp | 900 bp  | 800 bp  | 700 bp  | 600 bp  | 500 bp  |
|---------|---------|---------|---------|---------|---------|---------|
| 1000 bp | 1       | 0.99686 | 0.98475 | 0.95667 | 0.89861 | 0.78364 |
| 900 bp  | <.0001  | 1       | 0.99531 | 0.97621 | 0.92897 | 0.82632 |
| 800 bp  | <.0001  | <.0001  | 1       | 0.99241 | 0.95957 | 0.87417 |
| 700 bp  | <.0001  | <.0001  | <.0001  | 1       | 0.98666 | 0.92595 |
| 600 bp  | <.0001  | <.0001  | <.0001  | <.0001  | 1       | 0.97468 |
| 500 bp  | <.0001  | <.0001  | <.0001  | <.0001  | <.0001  | 1       |
