# Supplementary material for: Evaluating Methods for Isolating Total RNA and Predicting the Success of Sequencing Phylogenetically Diverse Plant Transcriptomes
Source: PubMed Central journal article supplement (PMC3504007; doi:10.1371/journal.pone.0050226), 2012-11-21
Supplement: pone.0050226.s005.pdf [file pone.0050226.s005.pdf]

**Table S4** Least-squares means of descriptors of RNA quality among different plant tissues types. The least-squares mean  $\pm$  1 SE and sample size are provided for each tissue type.

| <b>Tissue type</b>                             | <b><u>log<sub>e</sub>(RNA conc.)</u></b> |          | <b><u>26S:18S</u></b> |          | <b><u>RIN</u></b> |          | <b><u>OD 260/280</u></b> |          | <b><u>OD 260/230</u></b> |          |
|------------------------------------------------|------------------------------------------|----------|-----------------------|----------|-------------------|----------|--------------------------|----------|--------------------------|----------|
|                                                | <b>Mean</b>                              | <b>N</b> | <b>Mean</b>           | <b>N</b> | <b>Mean</b>       | <b>N</b> | <b>Mean</b>              | <b>N</b> | <b>Mean</b>              | <b>N</b> |
| Belowground                                    | 3.67 $\pm$ 0.08                          | 12       | 1.43 $\pm$ 0.18       | 12       | 7.49 $\pm$ 7.49   | 12       | 1.57 + 0.33              | 1        | 0.91 + 0.64              | 1        |
| Shoots/Stems                                   | 3.58 $\pm$ 0.09                          | 7        | 1.50 $\pm$ 0.24       | 7        | 6.24 $\pm$ 6.24   | 7        | 1.98 + 0.33              | 1        | 1.93 + 0.64              | 1        |
| Buds<br>(lvs <sup>a</sup> /flws <sup>b</sup> ) | 3.65 $\pm$ 0.22                          | 15       | 1.26 $\pm$ 0.16       | 15       | 6.75 $\pm$ 6.75   | 15       | 1.73 + 0.14              | 6        | 1.38 + 0.26              | 6        |
| Leaf                                           | 3.53 $\pm$ 0.05                          | 492      | 1.15 $\pm$ 0.03       | 489      | 6.21 $\pm$ 6.21   | 480      | 1.97 + 0.02              | 378      | 1.69 + 0.04              | 258      |
| Flower                                         | 3.96 $\pm$ 0.34                          | 4        | 1.00 $\pm$ 0.31       | 4        | 4.68 $\pm$ 4.68   | 4        | 2.07 + 0.24              | 2        | 1.40 + 0.46              | 2        |
| Fruit                                          | 2.73 $\pm$ 0.34                          | 10       | 1.55 $\pm$ 0.20       | 10       | 7.41 $\pm$ 7.41   | 10       | -                        | 0        | -                        | 0        |
| Mixed tissue                                   | 3.67 $\pm$ 0.07                          | 276      | 1.07 $\pm$ 0.04       | 276      | 5.99 $\pm$ 5.99   | 273      | 1.87 + 0.03              | 121      | 1.55 + 0.06              | 121      |
| Algal cells                                    | 3.30 $\pm$ 0.06                          | 274      | 1.47 $\pm$ 0.04       | 168      | 6.75 $\pm$ 6.75   | 268      | 1.03 + 0.33              | 1        | 0.94 + 0.64              | 1        |

<sup>a</sup>leaves. <sup>b</sup>flowers.
