# Supplementary material for: Evaluating Methods for Isolating Total RNA and Predicting the Success of Sequencing Phylogenetically Diverse Plant Transcriptomes
Source: PubMed Central journal article supplement (PMC3504007; doi:10.1371/journal.pone.0050226), 2012-11-21
Supplement: pone.0050226.s006.pdf [file pone.0050226.s006.pdf]

**Table S5** P-values for a posteriori pairwise contrasts of RNA quality among tissue types. P-values are adjusted for multiple comparisons within each variable using the Tukey-Kramer correction method. P-values < 0.05 are bolded.

| Tissue 1        | Tissue 2                                    | RNA mass          | P-values          |                   |            |            |
|-----------------|---------------------------------------------|-------------------|-------------------|-------------------|------------|------------|
|                 |                                             |                   | r26S:18S          | RIN               | OD 260/280 | OD 260/230 |
| Belowground     | Buds (lvs <sup>a</sup> /flws <sup>b</sup> ) | 0.9344            | 0.9974            | 0.9702            | 0.9995     | 0.9942     |
| Belowground     | Algal cells                                 | <b>0.0015</b>     | 1                 | 0.8795            | 0.9137     | 1          |
| Belowground     | Flower                                      | 0.4724            | 0.9368            | 0.1542            | 0.8845     | 0.9961     |
| Belowground     | Fruit                                       | <b>0.0234</b>     | 0.9998            | 1                 | -          | -          |
| Belowground     | Leaf                                        | 0.1685            | 0.815             | 0.2662            | 0.8989     | 0.8912     |
| Belowground     | Mixed tissue                                | 0.9602            | 0.5124            | 0.1195            | 0.9723     | 0.9561     |
| Belowground     | Shoot/Stem                                  | 0.4701            | 1                 | 0.8558            | 0.9769     | 0.9218     |
| Buds (lvs/flws) | Algal cells                                 | 0.1538            | 0.9157            | 1                 | 0.4615     | 0.996      |
| Buds (lvs/flws) | Flower                                      | 0.4849            | 0.9957            | 0.5044            | 0.8666     | 1          |
| Buds (lvs/flws) | Fruit                                       | <b>0.0386</b>     | 0.9475            | 0.9887            | -          | -          |
| Buds (lvs/flws) | Leaf                                        | 0.6048            | 0.9982            | 0.9561            | 0.5763     | 0.9012     |
| Buds (lvs/flws) | Mixed tissue                                | 0.9149            | 0.9388            | 0.7985            | 0.9415     | 0.995      |
| Buds (lvs/flws) | Shoot/Stem                                  | 0.7720            | 0.9906            | 0.999             | 0.9921     | 0.9851     |
| Algal cells     | Flower                                      | 0.1529            | 0.8133            | 0.3536            | 0.1452     | 0.9973     |
| Algal cells     | Fruit                                       | 0.1314            | 0.9999            | 0.9567            | -          | -          |
| Algal cells     | Leaf                                        | <b>0.0038</b>     | <b>&lt;0.0001</b> | <b>0.0039</b>     | 0.0766     | 0.9083     |
| Algal cells     | Mixed tissue                                | <b>&lt;0.0001</b> | <b>&lt;0.0001</b> | <b>&lt;0.0001</b> | 0.1565     | 0.9652     |
| Algal cells     | Shoot/Stem                                  | <b>0.0233</b>     | 1                 | 0.9969            | 0.4066     | 0.9317     |
| Flower          | Fruit                                       | <b>0.0326</b>     | 0.8107            | 0.2091            | -          | -          |
| Flower          | Leaf                                        | 0.3029            | 0.9997            | 0.7327            | 0.9995     | 0.9957     |
| Flower          | Mixed tissue                                | 0.4781            | 1                 | 0.8575            | 0.9813     | 0.9999     |
| Flower          | Shoot/Stem                                  | 0.3578            | 0.9055            | 0.8846            | 1          | 0.994      |
| Fruit           | Leaf                                        | <b>0.0453</b>     | 0.4903            | 0.4718            | -          | -          |
| Fruit           | Mixed tissue                                | <b>0.0225</b>     | 0.2346            | 0.2674            | -          | -          |
| Fruit           | Shoot/Stem                                  | <b>0.0369</b>     | 1                 | 0.9112            | -          | -          |
| Leaf            | Mixed tissue                                | 0.0874            | 0.558             | 0.8139            | 0.0955     | 0.4422     |
| Leaf            | Shoot/Stem                                  | 0.6345            | 0.8298            | 1                 | 1          | 0.9998     |
| Mixed tissue    | Shoot/Stem                                  | 0.4037            | 0.6051            | 1                 | 0.9999     | 0.9971     |

<sup>a</sup>leaves. <sup>b</sup>flowers.
