# Supplementary material for: Evaluating Methods for Isolating Total RNA and Predicting the Success of Sequencing Phylogenetically Diverse Plant Transcriptomes
Source: PubMed Central journal article supplement (PMC3504007; doi:10.1371/journal.pone.0050226), 2012-11-21
Supplement: pone.0050226.s007.pdf [file pone.0050226.s007.pdf]

**Table S6** Least-squares means of descriptors of sequencing success among plant tissue types. The least-squares mean  $\pm$  1 SE and sample size are provided for each tissue type.

| <b>Tissue type</b>                          | <b><u>Bases</u></b>   |          | <b><u>Q20</u></b>     |          | <b><u>Reads</u></b> |          | <b><u>Scaffolds</u></b> |          |
|---------------------------------------------|-----------------------|----------|-----------------------|----------|---------------------|----------|-------------------------|----------|
|                                             | <b>Mean</b>           | <b>N</b> | <b>Mean</b>           | <b>N</b> | <b>Mean</b>         | <b>N</b> | <b>Mean</b>             | <b>N</b> |
| Belowground                                 | 2.12 E9 $\pm$ 1.25 E8 | 13       | 2.05 E9 $\pm$ 1.26 E8 | 13       | 1.30 E7 $\pm$ 0.73  | 13       | 5983 $\pm$ 687          | 14       |
| Shoots/Stems                                | 1.76 E9 $\pm$ 1.36 E8 | 11       | 1.62 E9 $\pm$ 1.37 E8 | 11       | 1.19 E7 $\pm$ 0.80  | 11       | 6356 $\pm$ 747          | 11       |
| Buds (lvs <sup>a</sup> /flws <sup>b</sup> ) | 2.15 E9 $\pm$ 1.50 E8 | 9        | 2.07 E9 $\pm$ 1.52 E8 | 9        | 1.43 E7 $\pm$ 0.88  | 9        | 6761 $\pm$ 826          | 10       |
| Leaf                                        | 2.04 E9 $\pm$ 0.26 E8 | 304      | 1.96 E9 $\pm$ 0.26 E8 | 304      | 1.18 E7 $\pm$ 0.15  | 304      | 4826 $\pm$ 143          | 380      |
| Flower                                      | 2.45 E9 $\pm$ 3.19 E8 | 2        | 2.37 E9 $\pm$ 3.22 E8 | 2        | 1.51 E7 $\pm$ 1.87  | 2        | 6437 $\pm$ 1751         | 2        |
| Fruit                                       | 2.21 E9 $\pm$ 2.02 E8 | 5        | 2.13 E9 $\pm$ 2.03 E8 | 5        | 1.40 E7 $\pm$ 1.18  | 5        | 6816 $\pm$ 1108         | 5        |
| Mixed tissue                                | 2.02 E9 $\pm$ 0.36 E8 | 157      | 1.93 E9 $\pm$ 0.36 E8 | 157      | 1.17 E7 $\pm$ 0.21  | 157      | 5124 $\pm$ 198          | 206      |
| Algal cells                                 | 1.67 E9 $\pm$ 0.50 E8 | 83       | 1.46 E9 $\pm$ 0.50 E8 | 83       | 0.95 E7 $\pm$ 0.29  | 83       | 4709 $\pm$ 272          | 248      |

<sup>a</sup>leaves. <sup>b</sup>flowers.
