# Supplementary material for: Evaluating Methods for Isolating Total RNA and Predicting the Success of Sequencing Phylogenetically Diverse Plant Transcriptomes
Source: PubMed Central journal article supplement (PMC3504007; doi:10.1371/journal.pone.0050226), 2012-11-21
Supplement: pone.0050226.s008.pdf [file pone.0050226.s008.pdf]

**Table S7** P-values for a posteriori pairwise contrasts of various sequencing metrics among different tissue types. P-values are adjusted for multiple comparisons within each variable using the Tukey-Kramer correction method. P-values < 0.05 are bolded.

| Tissue 1        | Tissue 2                                    | P-values         |                  |                  |           |
|-----------------|---------------------------------------------|------------------|------------------|------------------|-----------|
|                 |                                             | Bases            | Q20              | Reads            | Scaffolds |
| Belowground     | Buds (lvs <sup>a</sup> /flws <sup>b</sup> ) | 1                | 1                | 0.9529           | 0.9963    |
| Belowground     | Algal cells                                 | <b>0.0189</b>    | <b>0.0004</b>    | <b>0.0002</b>    | 0.6716    |
| Belowground     | Flower                                      | 0.9679           | 0.9845           | 0.9694           | 1         |
| Belowground     | Fruit                                       | 0.9999           | 1                | 0.9956           | 0.9983    |
| Belowground     | Leaf                                        | 0.9987           | 0.9972           | 0.7556           | 0.7201    |
| Belowground     | Mixed tissue                                | 0.9958           | 0.9832           | 0.6628           | 0.9313    |
| Belowground     | Shoot/Stem                                  | 0.5426           | 0.2742           | 0.9683           | 1         |
| Buds (lvs/flws) | Algal cells                                 | <b>0.0462</b>    | <b>0.0039</b>    | <b>&lt;.0001</b> | 0.2634    |
| Buds (lvs/flws) | Flower                                      | 0.9846           | 0.9909           | 0.9999           | 1         |
| Buds (lvs/flws) | Fruit                                       | 1                | 1                | 1                | 1         |
| Buds (lvs/flws) | Leaf                                        | 0.9959           | 0.997            | 0.1059           | 0.2904    |
| Buds (lvs/flws) | Mixed tissue                                | 0.9906           | 0.9859           | 0.0792           | 0.5321    |
| Buds (lvs/flws) | Shoot/Stem                                  | 0.5435           | 0.3394           | 0.4655           | 1         |
| Algal cells     | Flower                                      | 0.1952           | 0.1019           | 0.0616           | 0.9779    |
| Algal cells     | Fruit                                       | 0.1469           | <b>0.0308</b>    | <b>0.0046</b>    | 0.588     |
| Algal cells     | Leaf                                        | <b>&lt;.0001</b> | <b>&lt;.0001</b> | <b>&lt;.0001</b> | 0.9999    |
| Algal cells     | Mixed tissue                                | <b>&lt;.0001</b> | <b>&lt;.0001</b> | <b>&lt;.0001</b> | 0.9217    |
| Algal cells     | Shoot/Stem                                  | 0.9975           | 0.9671           | 0.0852           | 0.4345    |
| Flower          | Fruit                                       | 0.9971           | 0.9987           | 0.9998           | 1         |
| Flower          | Leaf                                        | 0.8753           | 0.9141           | 0.6604           | 0.9845    |
| Flower          | Mixed tissue                                | 0.8522           | 0.8772           | 0.6157           | 0.9956    |
| Flower          | Shoot/Stem                                  | 0.45             | 0.383            | 0.7658           | 1         |
| Fruit           | Leaf                                        | 0.9901           | 0.9909           | 0.5738           | 0.6328    |
| Fruit           | Mixed tissue                                | 0.9829           | 0.9758           | 0.5064           | 0.8054    |
| Fruit           | Shoot/Stem                                  | 0.5912           | 0.4074           | 0.7993           | 1         |
| Leaf            | Mixed tissue                                | 0.9999           | 0.9959           | 0.9996           | 0.9252    |
| Leaf            | Shoot/Stem                                  | 0.4899           | 0.2041           | 1                | 0.4744    |
| Mixed tissue    | Shoot/Stem                                  | 0.5999           | 0.3455           | 1                | 0.7534    |

<sup>a</sup>leaves. <sup>b</sup>flowers.
