# Supplementary material for: Evaluating Methods for Isolating Total RNA and Predicting the Success of Sequencing Phylogenetically Diverse Plant Transcriptomes
Source: PubMed Central journal article supplement (PMC3504007; doi:10.1371/journal.pone.0050226), 2012-11-21
Supplement: pone.0050226.s009.pdf [file pone.0050226.s009.pdf]

**Table S8** The statistical fit of all possible combinations of explanatory factors in the data set that included OD ratios. Fit of models was statistically compared using maximum likelihood statistics according to the Akaike information criterion (AIC). Models are arranged in the order of best-fitting models (lowest AIC) to poorer fitting models (higher AIC). Inclusion or absence of explanatory variables from models is shown by 1 and 0, respectively.

| Tissue | RNA conc. | r26S:18S | RIN | OD 260/280 | OD 260/230 | Platform | µg RNA sequenced | Bases sequenced | AIC    |
|--------|-----------|----------|-----|------------|------------|----------|------------------|-----------------|--------|
| 1      | 0         | 1        | 1   | 1          | 1          | 1        | 1                | 0               | 3187   |
| 1      | 1         | 1        | 1   | 1          | 1          | 1        | 1                | 0               | 3187.8 |
| 1      | 0         | 0        | 1   | 1          | 1          | 1        | 1                | 0               | 3201.8 |
| 1      | 1         | 0        | 1   | 1          | 1          | 1        | 1                | 0               | 3202.6 |
| 1      | 0         | 1        | 1   | 1          | 1          | 1        | 0                | 0               | 3202.6 |
| 1      | 1         | 1        | 1   | 0          | 1          | 1        | 1                | 0               | 3204.3 |
| 1      | 0         | 1        | 1   | 0          | 1          | 1        | 1                | 0               | 3204.8 |
| 1      | 1         | 1        | 1   | 1          | 1          | 1        | 0                | 0               | 3206.1 |
| 1      | 0         | 1        | 0   | 1          | 1          | 1        | 1                | 0               | 3208.1 |
| 1      | 1         | 1        | 0   | 1          | 1          | 1        | 1                | 0               | 3209.7 |
| 1      | 0         | 1        | 1   | 1          | 1          | 1        | 1                | 1               | 3214.5 |
| 1      | 0         | 1        | 1   | 1          | 0          | 1        | 1                | 0               | 3214.6 |
| 1      | 1         | 1        | 1   | 1          | 0          | 1        | 1                | 0               | 3215.7 |
| 1      | 1         | 1        | 1   | 1          | 1          | 1        | 1                | 1               | 3215.7 |
| 0      | 0         | 1        | 1   | 1          | 1          | 1        | 1                | 0               | 3218.1 |
| 1      | 1         | 0        | 1   | 0          | 1          | 1        | 1                | 0               | 3219   |
| 1      | 0         | 0        | 1   | 1          | 1          | 1        | 0                | 0               | 3219.1 |
| 1      | 0         | 1        | 1   | 0          | 1          | 1        | 0                | 0               | 3219.2 |
| 0      | 1         | 1        | 1   | 1          | 1          | 1        | 1                | 0               | 3219.2 |
| 1      | 0         | 0        | 1   | 0          | 1          | 1        | 1                | 0               | 3219.6 |
| 1      | 0         | 1        | 0   | 1          | 1          | 1        | 0                | 0               | 3220.9 |
| 1      | 1         | 1        | 1   | 0          | 1          | 1        | 0                | 0               | 3222.5 |
| 1      | 1         | 0        | 1   | 1          | 1          | 1        | 0                | 0               | 3222.7 |
| 1      | 1         | 1        | 0   | 1          | 1          | 1        | 0                | 0               | 3224.4 |
| 1      | 0         | 1        | 1   | 1          | 0          | 1        | 0                | 0               | 3224.9 |
| 1      | 0         | 1        | 0   | 0          | 1          | 1        | 1                | 0               | 3226   |
| 1      | 1         | 1        | 0   | 0          | 1          | 1        | 1                | 0               | 3226.4 |
| 1      | 1         | 1        | 1   | 1          | 0          | 1        | 0                | 0               | 3228.1 |
| 1      | 0         | 1        | 1   | 0          | 0          | 1        | 1                | 0               | 3228.8 |
| 1      | 0         | 0        | 1   | 1          | 1          | 1        | 1                | 1               | 3229.2 |
| 1      | 1         | 1        | 1   | 0          | 0          | 1        | 1                | 0               | 3230.2 |
| 1      | 1         | 0        | 1   | 1          | 1          | 1        | 1                | 1               | 3230.4 |
| 1      | 0         | 0        | 1   | 1          | 0          | 1        | 1                | 0               | 3230.7 |
| 1      | 0         | 1        | 1   | 1          | 1          | 1        | 0                | 1               | 3230.8 |
| 1      | 1         | 0        | 1   | 1          | 0          | 1        | 1                | 0               | 3231.7 |
| 1      | 0         | 1        | 0   | 1          | 0          | 1        | 1                | 0               | 3232.2 |
| 1      | 1         | 1        | 1   | 0          | 1          | 1        | 1                | 1               | 3232.3 |

|   |   |   |   |   |   |   |   |   |        |
|---|---|---|---|---|---|---|---|---|--------|
| 1 | 0 | 1 | 1 | 0 | 1 | 1 | 1 | 1 | 3232.6 |
| 0 | 0 | 0 | 1 | 1 | 1 | 1 | 1 | 0 | 3233   |
| 1 | 1 | 1 | 0 | 1 | 0 | 1 | 1 | 0 | 3233.7 |
| 0 | 1 | 0 | 1 | 1 | 1 | 1 | 1 | 0 | 3234.1 |
| 1 | 1 | 1 | 1 | 1 | 1 | 1 | 0 | 1 | 3234.2 |
| 0 | 0 | 1 | 1 | 1 | 1 | 1 | 0 | 0 | 3234.4 |
| 1 | 0 | 0 | 1 | 0 | 1 | 1 | 0 | 0 | 3235.4 |
| 1 | 0 | 1 | 0 | 1 | 1 | 1 | 1 | 1 | 3235.4 |
| 1 | 0 | 0 | 0 | 1 | 1 | 1 | 1 | 0 | 3235.5 |
| 0 | 1 | 1 | 1 | 0 | 1 | 1 | 1 | 0 | 3235.7 |
| 0 | 0 | 1 | 1 | 0 | 1 | 1 | 1 | 0 | 3235.8 |
| 1 | 1 | 1 | 0 | 1 | 1 | 1 | 1 | 1 | 3237.3 |
| 1 | 1 | 0 | 0 | 1 | 1 | 1 | 1 | 0 | 3237.6 |
| 1 | 0 | 1 | 0 | 0 | 1 | 1 | 0 | 0 | 3237.8 |
| 0 | 1 | 1 | 1 | 1 | 1 | 1 | 0 | 0 | 3238   |
| 1 | 1 | 0 | 1 | 0 | 1 | 1 | 0 | 0 | 3238.9 |
| 1 | 0 | 1 | 1 | 0 | 0 | 1 | 0 | 0 | 3239   |
| 0 | 0 | 1 | 0 | 1 | 1 | 1 | 1 | 0 | 3239.3 |
| 1 | 1 | 1 | 0 | 0 | 1 | 1 | 0 | 0 | 3241   |
| 0 | 1 | 1 | 0 | 1 | 1 | 1 | 1 | 0 | 3241.1 |
| 1 | 0 | 1 | 0 | 1 | 0 | 1 | 0 | 0 | 3241.5 |
| 1 | 0 | 0 | 1 | 1 | 0 | 1 | 0 | 0 | 3242   |
| 1 | 1 | 1 | 1 | 0 | 0 | 1 | 0 | 0 | 3242.3 |
| 1 | 0 | 1 | 1 | 1 | 0 | 1 | 1 | 1 | 3242.7 |
| 1 | 1 | 1 | 1 | 1 | 0 | 1 | 1 | 1 | 3243.7 |
| 1 | 1 | 1 | 0 | 1 | 0 | 1 | 0 | 0 | 3244.7 |
| 1 | 0 | 0 | 1 | 0 | 0 | 1 | 1 | 0 | 3245   |
| 1 | 1 | 0 | 1 | 1 | 0 | 1 | 0 | 0 | 3245.4 |
| 0 | 0 | 1 | 1 | 1 | 1 | 1 | 1 | 1 | 3245.6 |
| 1 | 0 | 1 | 0 | 0 | 0 | 1 | 1 | 0 | 3246.3 |
| 0 | 0 | 1 | 1 | 1 | 0 | 1 | 1 | 0 | 3246.3 |
| 1 | 1 | 0 | 1 | 0 | 0 | 1 | 1 | 0 | 3246.6 |
| 1 | 1 | 0 | 1 | 0 | 1 | 1 | 1 | 1 | 3247   |
| 0 | 1 | 1 | 1 | 1 | 1 | 1 | 1 | 1 | 3247.1 |
| 1 | 0 | 0 | 1 | 0 | 1 | 1 | 1 | 1 | 3247.3 |
| 1 | 0 | 1 | 1 | 0 | 1 | 1 | 0 | 1 | 3247.3 |
| 1 | 0 | 0 | 1 | 1 | 1 | 1 | 0 | 1 | 3247.3 |
| 0 | 1 | 1 | 1 | 1 | 0 | 1 | 1 | 0 | 3247.7 |
| 1 | 1 | 1 | 0 | 0 | 0 | 1 | 1 | 0 | 3248   |
| 1 | 0 | 1 | 0 | 1 | 1 | 1 | 0 | 1 | 3249.1 |
| 1 | 1 | 1 | 1 | 0 | 1 | 1 | 0 | 1 | 3250.5 |
| 0 | 1 | 0 | 1 | 0 | 1 | 1 | 1 | 0 | 3250.6 |
| 0 | 0 | 0 | 1 | 0 | 1 | 1 | 1 | 0 | 3250.7 |

|   |   |   |   |   |   |   |   |   |        |
|---|---|---|---|---|---|---|---|---|--------|
| 1 | 1 | 0 | 1 | 1 | 1 | 1 | 0 | 1 | 3250.7 |
| 0 | 0 | 1 | 1 | 0 | 1 | 1 | 0 | 0 | 3250.9 |
| 1 | 0 | 0 | 0 | 1 | 1 | 1 | 0 | 0 | 3251   |
| 0 | 0 | 0 | 1 | 1 | 1 | 1 | 0 | 0 | 3251.3 |
| 1 | 0 | 1 | 1 | 1 | 1 | 0 | 1 | 0 | 3251.9 |
| 1 | 1 | 1 | 0 | 1 | 1 | 1 | 0 | 1 | 3252.5 |
| 0 | 0 | 1 | 0 | 1 | 1 | 1 | 0 | 0 | 3252.7 |
| 1 | 0 | 1 | 1 | 1 | 0 | 1 | 0 | 1 | 3252.9 |
| 1 | 0 | 0 | 0 | 0 | 1 | 1 | 1 | 0 | 3253.2 |
| 1 | 0 | 1 | 0 | 0 | 1 | 1 | 1 | 1 | 3253.6 |
| 1 | 1 | 0 | 0 | 1 | 1 | 1 | 0 | 0 | 3254.3 |
| 1 | 1 | 1 | 0 | 0 | 1 | 1 | 1 | 1 | 3254.3 |
| 0 | 1 | 1 | 1 | 0 | 1 | 1 | 0 | 0 | 3254.4 |
| 1 | 1 | 0 | 0 | 0 | 1 | 1 | 1 | 0 | 3254.4 |
| 1 | 1 | 1 | 1 | 1 | 1 | 0 | 1 | 0 | 3254.8 |
| 0 | 1 | 0 | 1 | 1 | 1 | 1 | 0 | 0 | 3254.8 |
| 1 | 0 | 1 | 0 | 0 | 0 | 1 | 0 | 0 | 3255.6 |
| 1 | 1 | 1 | 1 | 1 | 0 | 1 | 0 | 1 | 3255.9 |
| 0 | 1 | 1 | 0 | 1 | 1 | 1 | 0 | 0 | 3256.2 |
| 1 | 0 | 0 | 1 | 0 | 0 | 1 | 0 | 0 | 3256.3 |
| 0 | 0 | 1 | 1 | 1 | 0 | 1 | 0 | 0 | 3256.9 |
| 1 | 0 | 1 | 1 | 0 | 0 | 1 | 1 | 1 | 3256.9 |
| 0 | 0 | 1 | 0 | 0 | 1 | 1 | 1 | 0 | 3257.2 |
| 0 | 1 | 1 | 0 | 0 | 1 | 1 | 1 | 0 | 3257.9 |
| 1 | 1 | 1 | 1 | 0 | 0 | 1 | 1 | 1 | 3258.3 |
| 1 | 1 | 1 | 0 | 0 | 0 | 1 | 0 | 0 | 3258.8 |
| 1 | 0 | 0 | 1 | 1 | 0 | 1 | 1 | 1 | 3258.8 |
| 1 | 1 | 0 | 1 | 0 | 0 | 1 | 0 | 0 | 3259.7 |
| 1 | 1 | 0 | 1 | 1 | 0 | 1 | 1 | 1 | 3259.8 |
| 1 | 0 | 0 | 0 | 1 | 0 | 1 | 1 | 0 | 3260.1 |
| 1 | 0 | 1 | 0 | 1 | 0 | 1 | 1 | 1 | 3260.1 |
| 0 | 1 | 1 | 1 | 1 | 0 | 1 | 0 | 0 | 3260.3 |
| 0 | 0 | 1 | 1 | 0 | 0 | 1 | 1 | 0 | 3260.4 |
| 0 | 0 | 0 | 1 | 1 | 1 | 1 | 1 | 1 | 3260.4 |
| 1 | 1 | 1 | 0 | 1 | 0 | 1 | 1 | 1 | 3261.7 |
| 1 | 0 | 0 | 0 | 1 | 1 | 1 | 1 | 1 | 3261.7 |
| 0 | 1 | 0 | 1 | 1 | 1 | 1 | 1 | 1 | 3261.9 |
| 1 | 1 | 0 | 0 | 1 | 0 | 1 | 1 | 0 | 3262.1 |
| 0 | 1 | 1 | 1 | 0 | 0 | 1 | 1 | 0 | 3262.3 |
| 0 | 0 | 0 | 1 | 1 | 0 | 1 | 1 | 0 | 3262.6 |
| 0 | 0 | 1 | 1 | 1 | 1 | 1 | 0 | 1 | 3262.6 |
| 0 | 0 | 1 | 1 | 0 | 1 | 1 | 1 | 1 | 3263.6 |
| 1 | 0 | 0 | 1 | 0 | 1 | 1 | 0 | 1 | 3263.6 |

|   |   |   |   |   |   |   |   |   |        |
|---|---|---|---|---|---|---|---|---|--------|
| 0 | 1 | 1 | 1 | 0 | 1 | 1 | 1 | 1 | 3263.7 |
| 0 | 0 | 1 | 0 | 1 | 0 | 1 | 1 | 0 | 3263.8 |
| 0 | 1 | 0 | 1 | 1 | 0 | 1 | 1 | 0 | 3264   |
| 1 | 1 | 0 | 0 | 1 | 1 | 1 | 1 | 1 | 3264.2 |
| 0 | 1 | 1 | 0 | 1 | 0 | 1 | 1 | 0 | 3265.7 |
| 1 | 0 | 1 | 0 | 0 | 1 | 1 | 0 | 1 | 3265.9 |
| 0 | 1 | 1 | 1 | 1 | 1 | 1 | 0 | 1 | 3266   |
| 0 | 0 | 1 | 0 | 1 | 1 | 1 | 1 | 1 | 3266.6 |
| 1 | 1 | 0 | 1 | 0 | 1 | 1 | 0 | 1 | 3266.9 |
| 1 | 0 | 1 | 1 | 0 | 0 | 1 | 0 | 1 | 3267.1 |
| 1 | 0 | 0 | 0 | 0 | 1 | 1 | 0 | 0 | 3267.4 |
| 0 | 0 | 0 | 0 | 1 | 1 | 1 | 1 | 0 | 3267.4 |
| 0 | 0 | 0 | 1 | 0 | 1 | 1 | 0 | 0 | 3267.5 |
| 1 | 0 | 0 | 1 | 1 | 1 | 0 | 1 | 0 | 3268.2 |
| 0 | 1 | 1 | 0 | 1 | 1 | 1 | 1 | 1 | 3268.7 |
| 1 | 1 | 1 | 0 | 0 | 1 | 1 | 0 | 1 | 3269.1 |
| 0 | 0 | 1 | 0 | 0 | 1 | 1 | 0 | 0 | 3269.4 |
| 1 | 0 | 1 | 0 | 1 | 0 | 1 | 0 | 1 | 3269.6 |
| 0 | 1 | 0 | 0 | 1 | 1 | 1 | 1 | 0 | 3269.8 |
| 1 | 0 | 0 | 1 | 1 | 0 | 1 | 0 | 1 | 3270.1 |
| 1 | 1 | 1 | 1 | 0 | 0 | 1 | 0 | 1 | 3270.2 |
| 1 | 0 | 1 | 1 | 0 | 1 | 0 | 1 | 0 | 3270.4 |
| 1 | 1 | 0 | 0 | 0 | 1 | 1 | 0 | 0 | 3270.9 |
| 0 | 0 | 1 | 1 | 0 | 0 | 1 | 0 | 0 | 3271   |
| 1 | 0 | 0 | 0 | 1 | 0 | 1 | 0 | 0 | 3271   |
| 0 | 1 | 0 | 1 | 0 | 1 | 1 | 0 | 0 | 3271.1 |
| 1 | 1 | 0 | 1 | 1 | 1 | 0 | 1 | 0 | 3271.2 |
| 1 | 0 | 1 | 0 | 1 | 1 | 0 | 1 | 0 | 3272.3 |
| 1 | 1 | 1 | 0 | 1 | 0 | 1 | 0 | 1 | 3272.7 |
| 1 | 1 | 1 | 1 | 0 | 1 | 0 | 1 | 0 | 3272.9 |
| 0 | 1 | 1 | 0 | 0 | 1 | 1 | 0 | 0 | 3272.9 |
| 1 | 0 | 1 | 1 | 1 | 1 | 0 | 0 | 0 | 3273   |
| 1 | 0 | 0 | 1 | 0 | 0 | 1 | 1 | 1 | 3273   |
| 1 | 1 | 0 | 1 | 1 | 0 | 1 | 0 | 1 | 3273.3 |
| 0 | 0 | 1 | 0 | 1 | 0 | 1 | 0 | 0 | 3273.4 |
| 1 | 0 | 0 | 0 | 0 | 0 | 1 | 1 | 0 | 3274.2 |
| 1 | 0 | 1 | 0 | 0 | 0 | 1 | 1 | 1 | 3274.3 |
| 0 | 0 | 1 | 1 | 1 | 0 | 1 | 1 | 1 | 3274.3 |
| 1 | 1 | 0 | 0 | 1 | 0 | 1 | 0 | 0 | 3274.4 |
| 1 | 1 | 1 | 1 | 1 | 1 | 0 | 0 | 0 | 3274.4 |
| 0 | 1 | 1 | 1 | 0 | 0 | 1 | 0 | 0 | 3274.5 |
| 0 | 0 | 0 | 1 | 1 | 0 | 1 | 0 | 0 | 3274.5 |
| 1 | 1 | 0 | 1 | 0 | 0 | 1 | 1 | 1 | 3274.6 |

|   |   |   |   |   |   |   |   |   |        |
|---|---|---|---|---|---|---|---|---|--------|
| 1 | 1 | 1 | 0 | 1 | 1 | 0 | 1 | 0 | 3275.4 |
| 0 | 1 | 1 | 1 | 1 | 0 | 1 | 1 | 1 | 3275.7 |
| 1 | 1 | 1 | 0 | 0 | 0 | 1 | 1 | 1 | 3276   |
| 1 | 1 | 0 | 0 | 0 | 0 | 1 | 1 | 0 | 3276.5 |
| 0 | 1 | 1 | 0 | 1 | 0 | 1 | 0 | 0 | 3276.8 |
| 0 | 0 | 0 | 1 | 0 | 0 | 1 | 1 | 0 | 3276.9 |
| 0 | 0 | 1 | 0 | 0 | 0 | 1 | 1 | 0 | 3277.9 |
| 0 | 1 | 0 | 1 | 1 | 0 | 1 | 0 | 0 | 3278   |
| 0 | 0 | 0 | 1 | 0 | 1 | 1 | 1 | 1 | 3278.4 |
| 0 | 1 | 0 | 1 | 0 | 1 | 1 | 1 | 1 | 3278.5 |
| 1 | 0 | 0 | 0 | 1 | 1 | 1 | 0 | 1 | 3278.8 |
| 0 | 1 | 0 | 1 | 0 | 0 | 1 | 1 | 0 | 3278.9 |
| 0 | 0 | 1 | 1 | 0 | 1 | 1 | 0 | 1 | 3279   |
| 1 | 0 | 1 | 1 | 1 | 1 | 0 | 1 | 1 | 3279.4 |
| 0 | 0 | 0 | 1 | 1 | 1 | 1 | 0 | 1 | 3279.5 |
| 1 | 0 | 0 | 0 | 0 | 1 | 1 | 1 | 1 | 3279.8 |
| 0 | 1 | 1 | 0 | 0 | 0 | 1 | 1 | 0 | 3280   |
| 0 | 0 | 1 | 0 | 1 | 1 | 1 | 0 | 1 | 3280.8 |
| 1 | 1 | 0 | 0 | 0 | 1 | 1 | 1 | 1 | 3281.4 |
| 1 | 1 | 0 | 0 | 1 | 1 | 1 | 0 | 1 | 3281.9 |
| 0 | 1 | 1 | 1 | 0 | 1 | 1 | 0 | 1 | 3282.4 |
| 1 | 1 | 1 | 1 | 1 | 1 | 0 | 1 | 1 | 3282.4 |
| 0 | 1 | 0 | 1 | 1 | 1 | 1 | 0 | 1 | 3282.9 |
| 0 | 0 | 1 | 1 | 1 | 1 | 0 | 1 | 0 | 3283.2 |
| 1 | 0 | 1 | 0 | 0 | 0 | 1 | 0 | 1 | 3283.7 |
| 0 | 0 | 0 | 0 | 1 | 1 | 1 | 0 | 0 | 3283.9 |
| 1 | 0 | 0 | 1 | 0 | 0 | 1 | 0 | 1 | 3284.3 |
| 0 | 1 | 1 | 0 | 1 | 1 | 1 | 0 | 1 | 3284.3 |
| 0 | 0 | 1 | 0 | 0 | 1 | 1 | 1 | 1 | 3284.8 |
| 0 | 0 | 1 | 1 | 1 | 0 | 1 | 0 | 1 | 3284.9 |
| 0 | 0 | 0 | 0 | 0 | 1 | 1 | 1 | 0 | 3285   |
| 1 | 0 | 0 | 0 | 0 | 0 | 1 | 0 | 0 | 3285.2 |
| 0 | 1 | 1 | 0 | 0 | 1 | 1 | 1 | 1 | 3285.8 |
| 0 | 1 | 1 | 1 | 1 | 1 | 0 | 1 | 0 | 3286.1 |
| 0 | 1 | 0 | 0 | 0 | 1 | 1 | 1 | 0 | 3286.6 |
| 1 | 0 | 0 | 1 | 0 | 1 | 0 | 1 | 0 | 3286.6 |
| 1 | 1 | 1 | 0 | 0 | 0 | 1 | 0 | 1 | 3286.8 |
| 0 | 1 | 0 | 0 | 1 | 1 | 1 | 0 | 0 | 3287   |
| 1 | 0 | 0 | 0 | 1 | 0 | 1 | 1 | 1 | 3287.4 |
| 0 | 0 | 1 | 0 | 0 | 0 | 1 | 0 | 0 | 3287.5 |
| 1 | 1 | 0 | 1 | 0 | 0 | 1 | 0 | 1 | 3287.7 |
| 1 | 0 | 1 | 1 | 1 | 0 | 0 | 1 | 0 | 3287.9 |
| 0 | 1 | 1 | 1 | 1 | 0 | 1 | 0 | 1 | 3288.2 |

|   |   |   |   |   |   |   |   |   |        |
|---|---|---|---|---|---|---|---|---|--------|
| 0 | 0 | 1 | 1 | 0 | 0 | 1 | 1 | 1 | 3288.5 |
| 1 | 1 | 0 | 0 | 0 | 0 | 1 | 0 | 0 | 3288.7 |
| 0 | 0 | 0 | 1 | 0 | 0 | 1 | 0 | 0 | 3288.8 |
| 1 | 1 | 0 | 1 | 0 | 1 | 0 | 1 | 0 | 3289.1 |
| 1 | 1 | 0 | 0 | 1 | 0 | 1 | 1 | 1 | 3289.7 |
| 1 | 0 | 1 | 1 | 0 | 1 | 0 | 0 | 0 | 3289.8 |
| 1 | 0 | 1 | 0 | 1 | 1 | 0 | 0 | 0 | 3290.1 |
| 0 | 1 | 1 | 1 | 0 | 0 | 1 | 1 | 1 | 3290.4 |
| 0 | 0 | 0 | 1 | 1 | 0 | 1 | 1 | 1 | 3290.6 |
| 1 | 1 | 1 | 1 | 1 | 0 | 0 | 1 | 0 | 3290.8 |
| 0 | 1 | 1 | 0 | 0 | 0 | 1 | 0 | 0 | 3291   |
| 1 | 0 | 1 | 0 | 0 | 1 | 0 | 1 | 0 | 3291   |
| 1 | 1 | 1 | 0 | 1 | 1 | 0 | 0 | 0 | 3291.6 |
| 0 | 0 | 1 | 0 | 1 | 0 | 1 | 1 | 1 | 3291.8 |
| 0 | 1 | 0 | 1 | 1 | 0 | 1 | 1 | 1 | 3292.1 |
| 1 | 1 | 1 | 1 | 0 | 1 | 0 | 0 | 0 | 3292.3 |
| 0 | 1 | 0 | 1 | 0 | 0 | 1 | 0 | 0 | 3292.4 |
| 0 | 0 | 0 | 0 | 1 | 0 | 1 | 1 | 0 | 3292.5 |
| 1 | 0 | 0 | 1 | 1 | 1 | 0 | 0 | 0 | 3292.8 |
| 1 | 1 | 0 | 1 | 1 | 1 | 0 | 0 | 0 | 3293.4 |
| 0 | 0 | 0 | 0 | 1 | 1 | 1 | 1 | 1 | 3293.5 |
| 1 | 1 | 1 | 0 | 0 | 1 | 0 | 1 | 0 | 3293.7 |
| 0 | 1 | 1 | 0 | 1 | 0 | 1 | 1 | 1 | 3293.7 |
| 0 | 1 | 0 | 0 | 1 | 0 | 1 | 1 | 0 | 3294.9 |
| 1 | 0 | 0 | 0 | 0 | 1 | 1 | 0 | 1 | 3295.3 |
| 0 | 0 | 0 | 1 | 0 | 1 | 1 | 0 | 1 | 3295.6 |
| 1 | 0 | 0 | 1 | 1 | 1 | 0 | 1 | 1 | 3295.6 |
| 0 | 1 | 0 | 0 | 1 | 1 | 1 | 1 | 1 | 3296.2 |
| 0 | 0 | 1 | 0 | 0 | 1 | 1 | 0 | 1 | 3297.6 |
| 1 | 0 | 1 | 1 | 0 | 1 | 0 | 1 | 1 | 3298.1 |
| 1 | 1 | 0 | 1 | 1 | 1 | 0 | 1 | 1 | 3298.6 |
| 1 | 1 | 0 | 0 | 0 | 1 | 1 | 0 | 1 | 3298.7 |
| 1 | 0 | 0 | 0 | 1 | 0 | 1 | 0 | 1 | 3299   |
| 0 | 0 | 1 | 1 | 0 | 0 | 1 | 0 | 1 | 3299.1 |
| 0 | 1 | 0 | 1 | 0 | 1 | 1 | 0 | 1 | 3299.1 |
| 0 | 0 | 0 | 1 | 1 | 1 | 0 | 1 | 0 | 3299.6 |
| 1 | 0 | 1 | 0 | 1 | 1 | 0 | 1 | 1 | 3299.7 |
| 0 | 0 | 0 | 0 | 0 | 1 | 1 | 0 | 0 | 3300.1 |
| 1 | 0 | 1 | 1 | 1 | 0 | 0 | 0 | 0 | 3300.5 |
| 1 | 0 | 1 | 1 | 1 | 1 | 0 | 0 | 1 | 3300.5 |
| 1 | 1 | 1 | 1 | 0 | 1 | 0 | 1 | 1 | 3300.6 |
| 0 | 1 | 1 | 0 | 0 | 1 | 1 | 0 | 1 | 3301   |
| 1 | 0 | 0 | 0 | 0 | 0 | 1 | 1 | 1 | 3301.6 |

|   |   |   |   |   |   |   |   |   |        |
|---|---|---|---|---|---|---|---|---|--------|
| 0 | 0 | 1 | 0 | 1 | 0 | 1 | 0 | 1 | 3301.6 |
| 0 | 0 | 1 | 1 | 0 | 1 | 0 | 1 | 0 | 3301.7 |
| 1 | 1 | 1 | 1 | 1 | 1 | 0 | 0 | 1 | 3302.1 |
| 1 | 1 | 0 | 0 | 1 | 0 | 1 | 0 | 1 | 3302.3 |
| 0 | 1 | 1 | 1 | 0 | 0 | 1 | 0 | 1 | 3302.4 |
| 0 | 1 | 0 | 1 | 1 | 1 | 0 | 1 | 0 | 3302.5 |
| 0 | 0 | 0 | 1 | 1 | 0 | 1 | 0 | 1 | 3302.5 |
| 1 | 1 | 1 | 0 | 1 | 1 | 0 | 1 | 1 | 3302.7 |
| 1 | 0 | 1 | 1 | 0 | 0 | 0 | 1 | 0 | 3302.8 |
| 1 | 1 | 1 | 1 | 1 | 0 | 0 | 0 | 0 | 3302.9 |
| 0 | 1 | 0 | 0 | 0 | 1 | 1 | 0 | 0 | 3303.6 |
| 0 | 0 | 1 | 0 | 1 | 1 | 0 | 1 | 0 | 3303.7 |
| 0 | 0 | 0 | 0 | 1 | 0 | 1 | 0 | 0 | 3304.1 |
| 0 | 1 | 1 | 1 | 0 | 1 | 0 | 1 | 0 | 3304.1 |
| 1 | 1 | 0 | 0 | 0 | 0 | 1 | 1 | 1 | 3304.1 |
| 1 | 0 | 1 | 0 | 1 | 0 | 0 | 1 | 0 | 3304.2 |
| 0 | 0 | 1 | 1 | 1 | 1 | 0 | 0 | 0 | 3304.4 |
| 1 | 0 | 0 | 0 | 1 | 1 | 0 | 1 | 0 | 3304.5 |
| 0 | 1 | 1 | 0 | 1 | 0 | 1 | 0 | 1 | 3304.8 |
| 0 | 0 | 0 | 1 | 0 | 0 | 1 | 1 | 1 | 3304.9 |
| 0 | 1 | 1 | 1 | 1 | 1 | 0 | 0 | 0 | 3305.8 |
| 1 | 1 | 1 | 1 | 0 | 0 | 0 | 1 | 0 | 3305.9 |
| 0 | 0 | 1 | 0 | 0 | 0 | 1 | 1 | 1 | 3305.9 |
| 0 | 1 | 0 | 1 | 1 | 0 | 1 | 0 | 1 | 3305.9 |
| 0 | 0 | 0 | 0 | 0 | 0 | 1 | 1 | 0 | 3306.7 |
| 0 | 1 | 1 | 0 | 1 | 1 | 0 | 1 | 0 | 3306.7 |
| 1 | 0 | 0 | 1 | 1 | 0 | 0 | 1 | 0 | 3306.8 |
| 0 | 1 | 0 | 1 | 0 | 0 | 1 | 1 | 1 | 3306.9 |
| 1 | 1 | 1 | 0 | 1 | 0 | 0 | 1 | 0 | 3307.1 |
| 1 | 0 | 1 | 0 | 0 | 1 | 0 | 0 | 0 | 3307.2 |
| 1 | 1 | 0 | 0 | 1 | 1 | 0 | 1 | 0 | 3307.4 |
| 0 | 1 | 0 | 0 | 1 | 0 | 1 | 0 | 0 | 3307.5 |
| 0 | 1 | 1 | 0 | 0 | 0 | 1 | 1 | 1 | 3308   |
| 1 | 0 | 0 | 1 | 0 | 1 | 0 | 0 | 0 | 3309.3 |
| 0 | 1 | 0 | 0 | 0 | 0 | 1 | 1 | 0 | 3309.4 |
| 1 | 1 | 1 | 0 | 0 | 1 | 0 | 0 | 0 | 3309.7 |
| 1 | 1 | 0 | 1 | 1 | 0 | 0 | 1 | 0 | 3309.8 |
| 0 | 0 | 1 | 1 | 1 | 1 | 0 | 1 | 1 | 3310.7 |
| 1 | 1 | 0 | 1 | 0 | 1 | 0 | 0 | 0 | 3311.2 |
| 0 | 0 | 0 | 0 | 0 | 1 | 1 | 1 | 1 | 3311.6 |
| 0 | 0 | 0 | 0 | 1 | 1 | 1 | 0 | 1 | 3311.8 |
| 1 | 0 | 0 | 0 | 0 | 0 | 1 | 0 | 1 | 3313.2 |
| 0 | 1 | 0 | 0 | 0 | 1 | 1 | 1 | 1 | 3313.5 |

|   |   |   |   |   |   |   |   |   |        |
|---|---|---|---|---|---|---|---|---|--------|
| 0 | 1 | 1 | 1 | 1 | 1 | 0 | 1 | 1 | 3313.7 |
| 1 | 0 | 0 | 1 | 0 | 1 | 0 | 1 | 1 | 3314.2 |
| 0 | 1 | 0 | 0 | 1 | 1 | 1 | 0 | 1 | 3314.6 |
| 1 | 0 | 1 | 1 | 0 | 0 | 0 | 0 | 0 | 3315.4 |
| 1 | 0 | 1 | 1 | 1 | 0 | 0 | 1 | 1 | 3315.6 |
| 0 | 0 | 1 | 0 | 0 | 0 | 1 | 0 | 1 | 3315.7 |
| 1 | 0 | 1 | 0 | 1 | 0 | 0 | 0 | 0 | 3315.8 |
| 1 | 1 | 0 | 0 | 0 | 0 | 1 | 0 | 1 | 3316.6 |
| 0 | 0 | 0 | 1 | 0 | 0 | 1 | 0 | 1 | 3316.8 |
| 1 | 1 | 0 | 1 | 0 | 1 | 0 | 1 | 1 | 3316.8 |
| 1 | 0 | 1 | 1 | 0 | 1 | 0 | 0 | 1 | 3317.3 |
| 1 | 1 | 1 | 1 | 0 | 0 | 0 | 0 | 0 | 3317.6 |
| 1 | 0 | 1 | 0 | 1 | 1 | 0 | 0 | 1 | 3317.8 |
| 0 | 0 | 0 | 1 | 0 | 1 | 0 | 1 | 0 | 3318   |
| 1 | 1 | 1 | 0 | 1 | 0 | 0 | 0 | 0 | 3318.2 |
| 0 | 0 | 0 | 0 | 0 | 0 | 1 | 0 | 0 | 3318.3 |
| 1 | 1 | 1 | 1 | 1 | 0 | 0 | 1 | 1 | 3318.4 |
| 1 | 0 | 1 | 0 | 0 | 1 | 0 | 1 | 1 | 3318.5 |
| 1 | 0 | 1 | 0 | 0 | 0 | 0 | 1 | 0 | 3318.8 |
| 0 | 1 | 1 | 0 | 0 | 0 | 1 | 0 | 1 | 3319   |
| 0 | 0 | 1 | 1 | 1 | 0 | 0 | 1 | 0 | 3319.3 |
| 1 | 1 | 1 | 0 | 1 | 1 | 0 | 0 | 1 | 3319.3 |
| 0 | 0 | 0 | 0 | 1 | 0 | 1 | 1 | 1 | 3319.9 |
| 1 | 1 | 1 | 1 | 0 | 1 | 0 | 0 | 1 | 3319.9 |
| 0 | 1 | 0 | 1 | 0 | 0 | 1 | 0 | 1 | 3320.3 |
| 0 | 1 | 0 | 1 | 0 | 1 | 0 | 1 | 0 | 3320.4 |
| 1 | 0 | 0 | 1 | 1 | 1 | 0 | 0 | 1 | 3320.4 |
| 1 | 1 | 0 | 1 | 1 | 1 | 0 | 0 | 1 | 3321.1 |
| 0 | 0 | 1 | 1 | 0 | 1 | 0 | 0 | 0 | 3321.2 |
| 1 | 1 | 1 | 0 | 0 | 1 | 0 | 1 | 1 | 3321.3 |
| 0 | 0 | 1 | 0 | 1 | 1 | 0 | 0 | 0 | 3321.5 |
| 0 | 1 | 0 | 0 | 0 | 0 | 1 | 0 | 0 | 3321.8 |
| 1 | 0 | 0 | 1 | 1 | 0 | 0 | 0 | 0 | 3321.8 |
| 1 | 1 | 1 | 0 | 0 | 0 | 0 | 1 | 0 | 3321.9 |
| 1 | 0 | 0 | 1 | 0 | 0 | 0 | 1 | 0 | 3322.2 |
| 0 | 1 | 1 | 1 | 1 | 0 | 0 | 1 | 0 | 3322.2 |
| 0 | 0 | 1 | 0 | 0 | 1 | 0 | 1 | 0 | 3322.3 |
| 0 | 1 | 0 | 0 | 1 | 0 | 1 | 1 | 1 | 3322.5 |
| 1 | 0 | 0 | 0 | 0 | 1 | 0 | 1 | 0 | 3322.8 |
| 0 | 1 | 1 | 0 | 1 | 1 | 0 | 0 | 0 | 3323   |
| 1 | 1 | 0 | 1 | 1 | 0 | 0 | 0 | 0 | 3323.6 |
| 0 | 1 | 1 | 1 | 0 | 1 | 0 | 0 | 0 | 3323.7 |
| 0 | 0 | 0 | 1 | 1 | 1 | 0 | 0 | 0 | 3324.4 |



|   |   |   |   |   |   |   |   |   |        |
|---|---|---|---|---|---|---|---|---|--------|
| 0 | 1 | 0 | 1 | 1 | 1 | 0 | 0 | 0 | 3324.9 |
| 0 | 1 | 1 | 0 | 0 | 1 | 0 | 1 | 0 | 3325   |
| 1 | 1 | 0 | 1 | 0 | 0 | 0 | 1 | 0 | 3325.3 |
| 1 | 1 | 0 | 0 | 0 | 1 | 0 | 1 | 0 | 3325.8 |
| 1 | 1 | 0 | 0 | 1 | 1 | 0 | 0 | 0 | 3326.1 |
| 1 | 0 | 0 | 0 | 1 | 1 | 0 | 0 | 0 | 3326.8 |
| 0 | 0 | 0 | 1 | 1 | 1 | 0 | 1 | 1 | 3326.9 |
| 1 | 0 | 1 | 1 | 1 | 0 | 0 | 0 | 1 | 3327.7 |
| 0 | 0 | 0 | 0 | 0 | 1 | 1 | 0 | 1 | 3328.1 |
| 0 | 0 | 1 | 1 | 0 | 1 | 0 | 1 | 1 | 3329.4 |
| 0 | 1 | 0 | 1 | 1 | 1 | 0 | 1 | 1 | 3329.9 |
| 1 | 1 | 1 | 1 | 1 | 0 | 0 | 0 | 1 | 3330.3 |
| 1 | 0 | 1 | 0 | 0 | 0 | 0 | 0 | 0 | 3330.4 |
| 1 | 0 | 1 | 1 | 0 | 0 | 0 | 1 | 1 | 3330.5 |
| 1 | 0 | 0 | 0 | 1 | 1 | 0 | 1 | 1 | 3330.6 |
| 0 | 0 | 1 | 0 | 1 | 1 | 0 | 1 | 1 | 3331   |
| 0 | 1 | 0 | 0 | 0 | 1 | 1 | 0 | 1 | 3331.5 |
| 1 | 0 | 1 | 0 | 1 | 0 | 0 | 1 | 1 | 3331.9 |
| 0 | 1 | 1 | 1 | 0 | 1 | 0 | 1 | 1 | 3331.9 |
| 0 | 0 | 1 | 1 | 1 | 1 | 0 | 0 | 1 | 3331.9 |
| 0 | 0 | 1 | 1 | 1 | 0 | 0 | 0 | 0 | 3332   |
| 0 | 0 | 0 | 0 | 1 | 0 | 1 | 0 | 1 | 3332.1 |
| 1 | 1 | 1 | 0 | 0 | 0 | 0 | 0 | 0 | 3332.7 |
| 1 | 1 | 0 | 0 | 1 | 1 | 0 | 1 | 1 | 3333.4 |
| 1 | 1 | 1 | 1 | 0 | 0 | 0 | 1 | 1 | 3333.5 |
| 0 | 1 | 1 | 1 | 1 | 1 | 0 | 0 | 1 | 3333.5 |
| 0 | 1 | 1 | 0 | 1 | 1 | 0 | 1 | 1 | 3334   |
| 0 | 0 | 0 | 0 | 0 | 0 | 1 | 1 | 1 | 3334.1 |
| 0 | 0 | 1 | 1 | 0 | 0 | 0 | 1 | 0 | 3334.2 |
| 0 | 1 | 1 | 1 | 1 | 0 | 0 | 0 | 0 | 3334.4 |
| 1 | 0 | 0 | 1 | 1 | 0 | 0 | 1 | 1 | 3334.6 |
| 1 | 1 | 1 | 0 | 1 | 0 | 0 | 1 | 1 | 3334.8 |
| 1 | 0 | 1 | 0 | 0 | 1 | 0 | 0 | 1 | 3334.9 |
| 0 | 1 | 0 | 0 | 1 | 0 | 1 | 0 | 1 | 3335.4 |
| 0 | 0 | 1 | 0 | 1 | 0 | 0 | 1 | 0 | 3335.6 |
| 0 | 0 | 0 | 0 | 1 | 1 | 0 | 1 | 0 | 3336   |
| 1 | 0 | 0 | 1 | 0 | 1 | 0 | 0 | 1 | 3336.8 |
| 0 | 1 | 0 | 0 | 0 | 0 | 1 | 1 | 1 | 3336.9 |
| 1 | 0 | 0 | 1 | 0 | 0 | 0 | 0 | 0 | 3337.1 |
| 0 | 1 | 1 | 1 | 0 | 0 | 0 | 1 | 0 | 3337.3 |
| 1 | 1 | 0 | 1 | 1 | 0 | 0 | 1 | 1 | 3337.4 |
| 1 | 1 | 1 | 0 | 0 | 1 | 0 | 0 | 1 | 3337.5 |
| 1 | 0 | 0 | 0 | 1 | 0 | 0 | 1 | 0 | 3337.7 |

|   |   |   |   |   |   |   |   |   |        |
|---|---|---|---|---|---|---|---|---|--------|
| 0 | 0 | 0 | 1 | 1 | 0 | 0 | 1 | 0 | 3338.4 |
| 1 | 1 | 0 | 1 | 0 | 0 | 0 | 0 | 0 | 3338.5 |
| 0 | 1 | 1 | 0 | 1 | 0 | 0 | 1 | 0 | 3338.6 |
| 0 | 0 | 1 | 0 | 0 | 1 | 0 | 0 | 0 | 3338.6 |
| 1 | 1 | 0 | 1 | 0 | 1 | 0 | 0 | 1 | 3338.8 |
| 0 | 1 | 0 | 0 | 1 | 1 | 0 | 1 | 0 | 3338.9 |
| 1 | 1 | 0 | 0 | 1 | 0 | 0 | 1 | 0 | 3340.4 |
| 0 | 0 | 0 | 1 | 0 | 1 | 0 | 0 | 0 | 3340.9 |
| 0 | 1 | 1 | 0 | 0 | 1 | 0 | 0 | 0 | 3341.1 |
| 0 | 1 | 0 | 1 | 1 | 0 | 0 | 1 | 0 | 3341.3 |
| 1 | 0 | 1 | 1 | 0 | 0 | 0 | 0 | 1 | 3342.5 |
| 0 | 1 | 0 | 1 | 0 | 1 | 0 | 0 | 0 | 3342.6 |
| 1 | 0 | 1 | 0 | 1 | 0 | 0 | 0 | 1 | 3343.2 |
| 1 | 0 | 0 | 0 | 0 | 1 | 0 | 0 | 0 | 3343.5 |
| 1 | 1 | 0 | 0 | 0 | 1 | 0 | 0 | 0 | 3344.3 |
| 1 | 1 | 1 | 1 | 0 | 0 | 0 | 0 | 1 | 3345   |
| 0 | 0 | 0 | 1 | 0 | 1 | 0 | 1 | 1 | 3345.6 |
| 1 | 1 | 1 | 0 | 1 | 0 | 0 | 0 | 1 | 3345.8 |
| 0 | 0 | 0 | 0 | 0 | 0 | 1 | 0 | 1 | 3346.4 |
| 1 | 0 | 1 | 0 | 0 | 0 | 0 | 1 | 1 | 3346.6 |
| 0 | 0 | 1 | 1 | 0 | 0 | 0 | 0 | 0 | 3346.9 |
| 0 | 0 | 1 | 1 | 1 | 0 | 0 | 1 | 1 | 3347   |
| 0 | 0 | 1 | 0 | 1 | 0 | 0 | 0 | 0 | 3347.3 |
| 0 | 1 | 0 | 1 | 0 | 1 | 0 | 1 | 1 | 3348.1 |
| 0 | 0 | 1 | 1 | 0 | 1 | 0 | 0 | 1 | 3348.6 |
| 1 | 0 | 0 | 1 | 1 | 0 | 0 | 0 | 1 | 3349   |
| 0 | 1 | 1 | 1 | 0 | 0 | 0 | 0 | 0 | 3349.1 |
| 0 | 0 | 1 | 0 | 1 | 1 | 0 | 0 | 1 | 3349.2 |
| 1 | 0 | 0 | 0 | 0 | 1 | 0 | 1 | 1 | 3349.5 |
| 1 | 1 | 1 | 0 | 0 | 0 | 0 | 1 | 1 | 3349.6 |
| 0 | 1 | 1 | 0 | 1 | 0 | 0 | 0 | 0 | 3349.7 |
| 0 | 1 | 0 | 0 | 0 | 0 | 1 | 0 | 1 | 3349.7 |
| 0 | 1 | 1 | 1 | 1 | 0 | 0 | 1 | 1 | 3349.9 |
| 0 | 0 | 1 | 0 | 0 | 1 | 0 | 1 | 1 | 3349.9 |
| 1 | 0 | 0 | 1 | 0 | 0 | 0 | 1 | 1 | 3350   |
| 0 | 0 | 1 | 0 | 0 | 0 | 0 | 1 | 0 | 3350.3 |
| 0 | 1 | 1 | 0 | 1 | 1 | 0 | 0 | 1 | 3350.7 |
| 1 | 1 | 0 | 1 | 1 | 0 | 0 | 0 | 1 | 3351.1 |
| 0 | 1 | 1 | 1 | 0 | 1 | 0 | 0 | 1 | 3351.3 |
| 0 | 0 | 0 | 1 | 1 | 1 | 0 | 0 | 1 | 3351.9 |
| 1 | 0 | 0 | 0 | 1 | 0 | 0 | 0 | 0 | 3352.3 |
| 1 | 1 | 0 | 0 | 0 | 1 | 0 | 1 | 1 | 3352.4 |
| 1 | 0 | 0 | 0 | 0 | 0 | 0 | 1 | 0 | 3352.6 |

|   |   |   |   |   |   |   |   |   |        |
|---|---|---|---|---|---|---|---|---|--------|
| 0 | 1 | 0 | 1 | 1 | 1 | 0 | 0 | 1 | 3352.6 |
| 0 | 1 | 1 | 0 | 0 | 1 | 0 | 1 | 1 | 3352.7 |
| 1 | 1 | 0 | 1 | 0 | 0 | 0 | 1 | 1 | 3352.9 |
| 1 | 1 | 0 | 0 | 1 | 0 | 0 | 0 | 0 | 3353   |
| 0 | 1 | 1 | 0 | 0 | 0 | 0 | 1 | 0 | 3353.3 |
| 1 | 1 | 0 | 0 | 1 | 1 | 0 | 0 | 1 | 3353.3 |
| 0 | 0 | 0 | 1 | 1 | 0 | 0 | 0 | 0 | 3353.6 |
| 0 | 0 | 0 | 1 | 0 | 0 | 0 | 1 | 0 | 3353.8 |
| 0 | 0 | 0 | 0 | 0 | 1 | 0 | 1 | 0 | 3354.4 |
| 1 | 0 | 0 | 0 | 1 | 1 | 0 | 0 | 1 | 3354.6 |
| 1 | 1 | 0 | 0 | 0 | 0 | 0 | 1 | 0 | 3355.3 |
| 0 | 1 | 0 | 1 | 1 | 0 | 0 | 0 | 0 | 3355.3 |
| 0 | 1 | 0 | 1 | 0 | 0 | 0 | 1 | 0 | 3356.8 |
| 0 | 1 | 0 | 0 | 0 | 1 | 0 | 1 | 0 | 3357.3 |
| 1 | 0 | 1 | 0 | 0 | 0 | 0 | 0 | 1 | 3357.8 |
| 0 | 1 | 0 | 0 | 1 | 1 | 0 | 0 | 0 | 3357.9 |
| 0 | 0 | 1 | 1 | 1 | 0 | 0 | 0 | 1 | 3359.2 |
| 1 | 1 | 1 | 0 | 0 | 0 | 0 | 0 | 1 | 3360.3 |
| 0 | 1 | 1 | 1 | 1 | 0 | 0 | 0 | 1 | 3361.8 |
| 0 | 0 | 1 | 0 | 0 | 0 | 0 | 0 | 0 | 3361.9 |
| 0 | 0 | 1 | 1 | 0 | 0 | 0 | 1 | 1 | 3361.9 |
| 0 | 0 | 0 | 0 | 1 | 1 | 0 | 1 | 1 | 3362.2 |
| 0 | 0 | 1 | 0 | 1 | 0 | 0 | 1 | 1 | 3363.4 |
| 0 | 1 | 1 | 0 | 0 | 0 | 0 | 0 | 0 | 3364.2 |
| 1 | 0 | 0 | 1 | 0 | 0 | 0 | 0 | 1 | 3364.3 |
| 0 | 1 | 1 | 1 | 0 | 0 | 0 | 1 | 1 | 3365   |
| 0 | 1 | 0 | 0 | 1 | 1 | 0 | 1 | 1 | 3365   |
| 1 | 0 | 0 | 0 | 1 | 0 | 0 | 1 | 1 | 3365.1 |
| 1 | 1 | 0 | 1 | 0 | 0 | 0 | 0 | 1 | 3366   |
| 0 | 0 | 0 | 1 | 1 | 0 | 0 | 1 | 1 | 3366.1 |
| 0 | 0 | 1 | 0 | 0 | 1 | 0 | 0 | 1 | 3366.2 |
| 0 | 1 | 1 | 0 | 1 | 0 | 0 | 1 | 1 | 3366.3 |
| 1 | 0 | 0 | 0 | 0 | 0 | 0 | 0 | 0 | 3367.2 |
| 1 | 1 | 0 | 0 | 0 | 0 | 0 | 0 | 0 | 3367.7 |
| 1 | 1 | 0 | 0 | 1 | 0 | 0 | 1 | 1 | 3367.7 |
| 0 | 0 | 0 | 1 | 0 | 1 | 0 | 0 | 1 | 3368.3 |
| 0 | 1 | 1 | 0 | 0 | 1 | 0 | 0 | 1 | 3368.9 |
| 0 | 0 | 0 | 1 | 0 | 0 | 0 | 0 | 0 | 3369   |
| 0 | 1 | 0 | 1 | 1 | 0 | 0 | 1 | 1 | 3369   |
| 0 | 0 | 0 | 0 | 1 | 0 | 0 | 1 | 0 | 3369.4 |
| 0 | 1 | 0 | 1 | 0 | 0 | 0 | 0 | 0 | 3370.2 |
| 0 | 1 | 0 | 1 | 0 | 1 | 0 | 0 | 1 | 3370.3 |
| 1 | 0 | 0 | 0 | 0 | 1 | 0 | 0 | 1 | 3371.2 |
