# Supplementary material for: Evaluating Methods for Isolating Total RNA and Predicting the Success of Sequencing Phylogenetically Diverse Plant Transcriptomes
Source: PubMed Central journal article supplement (PMC3504007; doi:10.1371/journal.pone.0050226), 2012-11-21
Supplement: pone.0050226.s010.pdf [file pone.0050226.s010.pdf]

**Table S9** The statistical fit of all possible linear combinations of factors in the large data set that excluded OD ratios. The fit of models was statistically compared using maximum likelihood statistics according to the Akaike Information Criterion (AIC). Models are arranged in the order of the best-fitting models (lowest AIC) to poorer fitting models (higher AIC). The inclusion or absence of explanatory variables from models is shown by 1 and 0, respectively.

| Tissue | RNA conc. | r26S:18S | RIN | Platform | µg RNA sequenced | Bases sequenced | AIC    |
|--------|-----------|----------|-----|----------|------------------|-----------------|--------|
| 1      | 0         | 1        | 1   | 1        | 1                | 0               | 9174   |
| 1      | 1         | 1        | 1   | 1        | 1                | 0               | 9177.3 |
| 1      | 0         | 0        | 1   | 1        | 1                | 0               | 9188.1 |
| 1      | 0         | 1        | 1   | 1        | 1                | 1               | 9189.9 |
| 1      | 1         | 0        | 1   | 1        | 1                | 0               | 9191.4 |
| 1      | 0         | 1        | 0   | 1        | 1                | 0               | 9193.1 |
| 1      | 1         | 1        | 1   | 1        | 1                | 1               | 9193.5 |
| 1      | 0         | 1        | 1   | 1        | 0                | 0               | 9193.7 |
| 1      | 1         | 1        | 1   | 1        | 0                | 0               | 9194.2 |
| 1      | 1         | 1        | 0   | 1        | 1                | 0               | 9196.5 |
| 1      | 0         | 0        | 1   | 1        | 1                | 1               | 9204.4 |
| 1      | 0         | 1        | 1   | 1        | 0                | 1               | 9206.8 |
| 1      | 1         | 0        | 1   | 1        | 1                | 1               | 9208   |
| 1      | 0         | 0        | 1   | 1        | 0                | 0               | 9208.4 |
| 1      | 1         | 0        | 1   | 1        | 0                | 0               | 9208.5 |
| 1      | 1         | 1        | 1   | 1        | 0                | 1               | 9209.7 |
| 1      | 0         | 1        | 0   | 1        | 1                | 1               | 9210.7 |
| 1      | 0         | 1        | 0   | 1        | 0                | 0               | 9213.2 |
| 1      | 1         | 1        | 0   | 1        | 0                | 0               | 9213.8 |
| 1      | 1         | 1        | 0   | 1        | 1                | 1               | 9214.3 |
| 1      | 0         | 0        | 0   | 1        | 1                | 0               | 9215.1 |
| 1      | 1         | 0        | 0   | 1        | 1                | 0               | 9218.2 |
| 1      | 0         | 0        | 1   | 1        | 0                | 1               | 9221.9 |
| 1      | 1         | 0        | 1   | 1        | 0                | 1               | 9224.6 |
| 1      | 0         | 1        | 0   | 1        | 0                | 1               | 9228.1 |
| 1      | 1         | 1        | 0   | 1        | 0                | 1               | 9231   |
| 1      | 0         | 0        | 0   | 1        | 1                | 1               | 9235   |
| 1      | 1         | 0        | 0   | 1        | 0                | 0               | 9236.6 |
| 1      | 0         | 0        | 0   | 1        | 0                | 0               | 9237.4 |
| 1      | 1         | 0        | 0   | 1        | 1                | 1               | 9238.6 |
| 1      | 0         | 0        | 0   | 1        | 0                | 1               | 9254.8 |
| 1      | 1         | 0        | 0   | 1        | 0                | 1               | 9256.6 |
| 1      | 0         | 1        | 1   | 0        | 1                | 0               | 9261.5 |
| 1      | 1         | 1        | 1   | 0        | 1                | 0               | 9263.7 |
| 1      | 0         | 1        | 1   | 0        | 1                | 1               | 9273   |

|   |   |   |   |   |   |   |        |
|---|---|---|---|---|---|---|--------|
| 1 | 1 | 1 | 1 | 0 | 0 | 0 | 9276.3 |
| 1 | 1 | 1 | 1 | 0 | 1 | 1 | 9276.4 |
| 1 | 0 | 1 | 1 | 0 | 0 | 0 | 9277.2 |
| 1 | 0 | 0 | 1 | 0 | 1 | 0 | 9277.7 |
| 1 | 1 | 0 | 1 | 0 | 1 | 0 | 9279.5 |
| 0 | 0 | 1 | 1 | 1 | 1 | 0 | 9280.5 |
| 1 | 0 | 1 | 0 | 0 | 1 | 0 | 9280.8 |
| 1 | 1 | 1 | 0 | 0 | 1 | 0 | 9283   |
| 0 | 1 | 1 | 1 | 1 | 1 | 0 | 9284.1 |
| 1 | 0 | 1 | 1 | 0 | 0 | 1 | 9286.3 |
| 1 | 1 | 1 | 1 | 0 | 0 | 1 | 9288.6 |
| 1 | 0 | 0 | 1 | 0 | 1 | 1 | 9289.8 |
| 1 | 1 | 0 | 1 | 0 | 0 | 0 | 9292.4 |
| 1 | 1 | 0 | 1 | 0 | 1 | 1 | 9293.1 |
| 1 | 0 | 0 | 1 | 0 | 0 | 0 | 9294.1 |
| 1 | 0 | 1 | 0 | 0 | 1 | 1 | 9294.2 |
| 0 | 0 | 0 | 1 | 1 | 1 | 0 | 9294.6 |
| 1 | 1 | 1 | 0 | 0 | 0 | 0 | 9295.9 |
| 0 | 0 | 1 | 1 | 1 | 1 | 1 | 9296.3 |
| 1 | 0 | 1 | 0 | 0 | 0 | 0 | 9296.8 |
| 1 | 1 | 1 | 0 | 0 | 1 | 1 | 9297.6 |
| 0 | 1 | 0 | 1 | 1 | 1 | 0 | 9298.1 |
| 0 | 0 | 1 | 0 | 1 | 1 | 0 | 9299.8 |
| 0 | 1 | 1 | 1 | 1 | 1 | 1 | 9299.9 |
| 0 | 0 | 1 | 1 | 1 | 0 | 0 | 9302   |
| 0 | 1 | 1 | 1 | 1 | 0 | 0 | 9303.3 |
| 0 | 1 | 1 | 0 | 1 | 1 | 0 | 9303.4 |
| 1 | 0 | 0 | 1 | 0 | 0 | 1 | 9303.8 |
| 1 | 1 | 0 | 1 | 0 | 0 | 1 | 9305.5 |
| 1 | 0 | 1 | 0 | 0 | 0 | 1 | 9307.9 |
| 1 | 0 | 0 | 0 | 0 | 1 | 0 | 9308.9 |
| 1 | 1 | 1 | 0 | 0 | 0 | 1 | 9310.1 |
| 1 | 1 | 0 | 0 | 0 | 1 | 0 | 9310.3 |
| 0 | 0 | 0 | 1 | 1 | 1 | 1 | 9311.3 |
| 0 | 0 | 1 | 1 | 1 | 0 | 1 | 9314.5 |
| 0 | 1 | 0 | 1 | 1 | 1 | 1 | 9315   |
| 0 | 0 | 0 | 1 | 1 | 0 | 0 | 9316.5 |
| 0 | 0 | 1 | 0 | 1 | 1 | 1 | 9317.1 |
| 0 | 1 | 0 | 1 | 1 | 0 | 0 | 9317.5 |
| 0 | 1 | 1 | 1 | 1 | 0 | 1 | 9317.7 |
| 0 | 1 | 1 | 0 | 1 | 1 | 1 | 9320.6 |
| 0 | 0 | 1 | 0 | 1 | 0 | 0 | 9321.8 |
| 0 | 0 | 0 | 0 | 1 | 1 | 0 | 9322.6 |

|   |   |   |   |   |   |   |        |
|---|---|---|---|---|---|---|--------|
| 0 | 1 | 1 | 0 | 1 | 0 | 0 | 9323.3 |
| 1 | 1 | 0 | 0 | 0 | 0 | 0 | 9324.1 |
| 1 | 0 | 0 | 0 | 0 | 1 | 1 | 9325.5 |
| 0 | 1 | 0 | 0 | 1 | 1 | 0 | 9326   |
| 1 | 0 | 0 | 0 | 0 | 0 | 0 | 9327.1 |
| 1 | 1 | 0 | 0 | 0 | 1 | 1 | 9328.4 |
| 0 | 0 | 0 | 1 | 1 | 0 | 1 | 9330.1 |
| 0 | 1 | 0 | 1 | 1 | 0 | 1 | 9333.1 |
| 0 | 0 | 1 | 0 | 1 | 0 | 1 | 9335.9 |
| 0 | 1 | 1 | 0 | 1 | 0 | 1 | 9339.2 |
| 1 | 0 | 0 | 0 | 0 | 0 | 1 | 9341.5 |
| 1 | 1 | 0 | 0 | 0 | 0 | 1 | 9341.9 |
| 0 | 0 | 0 | 0 | 1 | 1 | 1 | 9343.7 |
| 0 | 0 | 0 | 0 | 1 | 0 | 0 | 9346.5 |
| 0 | 1 | 0 | 0 | 1 | 0 | 0 | 9346.8 |
| 0 | 1 | 0 | 0 | 1 | 1 | 1 | 9347.3 |
| 0 | 0 | 0 | 0 | 1 | 0 | 1 | 9365   |
| 0 | 1 | 0 | 0 | 1 | 0 | 1 | 9367.2 |
| 0 | 0 | 1 | 1 | 0 | 1 | 0 | 9382.5 |
| 0 | 1 | 1 | 1 | 0 | 1 | 0 | 9385.1 |
| 0 | 0 | 1 | 1 | 0 | 1 | 1 | 9388   |
| 0 | 1 | 1 | 1 | 0 | 1 | 1 | 9391.6 |
| 0 | 0 | 1 | 1 | 0 | 0 | 0 | 9397   |
| 0 | 1 | 1 | 1 | 0 | 0 | 0 | 9397.3 |
| 0 | 0 | 0 | 1 | 0 | 1 | 0 | 9398.1 |
| 0 | 0 | 1 | 1 | 0 | 0 | 1 | 9400   |
| 0 | 1 | 0 | 1 | 0 | 1 | 0 | 9400.4 |
| 0 | 1 | 1 | 1 | 0 | 0 | 1 | 9403.1 |
| 0 | 0 | 0 | 1 | 0 | 1 | 1 | 9405.1 |
| 0 | 0 | 1 | 0 | 0 | 1 | 0 | 9406.4 |
| 0 | 1 | 0 | 1 | 0 | 1 | 1 | 9408.6 |
| 0 | 1 | 1 | 0 | 0 | 1 | 0 | 9409.1 |
| 0 | 1 | 0 | 1 | 0 | 0 | 0 | 9412.7 |
| 0 | 0 | 0 | 1 | 0 | 0 | 0 | 9412.9 |
| 0 | 0 | 1 | 0 | 0 | 1 | 1 | 9413.7 |
| 0 | 1 | 1 | 0 | 0 | 1 | 1 | 9417.2 |
| 0 | 0 | 0 | 1 | 0 | 0 | 1 | 9417.6 |
| 0 | 1 | 0 | 1 | 0 | 0 | 1 | 9420.2 |
| 0 | 0 | 1 | 0 | 0 | 0 | 0 | 9421   |
| 0 | 1 | 1 | 0 | 0 | 0 | 0 | 9421.6 |
| 0 | 0 | 1 | 0 | 0 | 0 | 1 | 9425.9 |
| 0 | 1 | 1 | 0 | 0 | 0 | 1 | 9429   |
| 0 | 0 | 0 | 0 | 0 | 1 | 0 | 9438.1 |

|   |   |   |   |   |   |   |        |
|---|---|---|---|---|---|---|--------|
| 0 | 1 | 0 | 0 | 0 | 1 | 0 | 9439.9 |
| 0 | 0 | 0 | 0 | 0 | 1 | 1 | 9451.5 |
| 0 | 1 | 0 | 0 | 0 | 0 | 0 | 9452.9 |
| 0 | 1 | 0 | 0 | 0 | 1 | 1 | 9454.6 |
| 0 | 0 | 0 | 0 | 0 | 0 | 1 | 9465.6 |
| 0 | 1 | 0 | 0 | 0 | 0 | 1 | 9467   |

---
